# Supplementary material for: Stabilizing inorganic photoelectrodes for efficient solar-to-chemical energy conversion
Source: Royal Society of Chemistry journal article supplement (doi:10.1039/c3ee40258d), 2013-01-01
Supplement: c3ee40258d.pdf [file c3ee40258d.pdf]

## Stabilizing inorganic photoelectrodes for efficient solar-to-chemical energy conversion

Syed Mubeen<sup>a, b</sup>, Joun Lee<sup>b</sup>, Nirala Singh<sup>a</sup>, Martin Moskovits<sup>b</sup> & Eric W. McFarland<sup>\*a</sup>

Received (in XXX, XXX) Xth XXXXXXXXXX 20XX, Accepted Xth XXXXXXXXXX 20XX

DOI: 10.1039/b000000x

<sup>a</sup>Department of Chemical Engineering, University of California, Santa Barbara, California 93106, USA

E-mail: [ewmcfar@engineering.ucsb.edu](mailto:ewmcfar@engineering.ucsb.edu)

<sup>b</sup>Department of Chemistry and Biochemistry, University of California, Santa Barbara, California 93106, USA

10

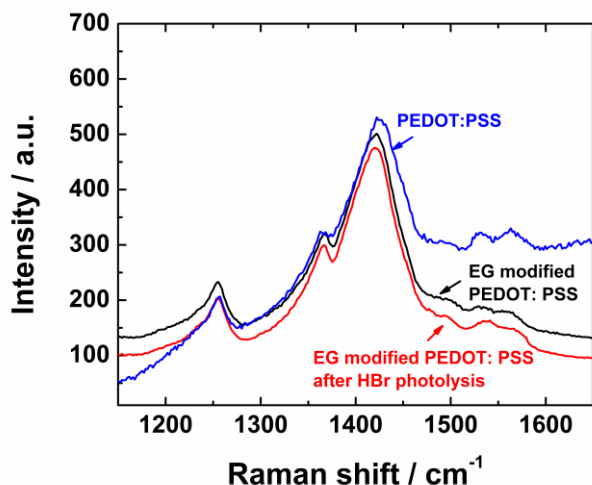

15 **Figure S1.** Raman spectroscopy of untreated PEDOT: PSS (blue trace) and ethylene glycol treated PEDOT:PSS (black trace). Raman spectroscopy of ethylene glycol treated PEDOT: PSS after 18 hours of HBr electrolysis is also shown (red trace). The Raman band between 1400 and 1500  $\text{cm}^{-1}$  shows a slight red shift and becomes narrower after EG treatment. No change was observed in Raman spectra after HBr photolysis.

20

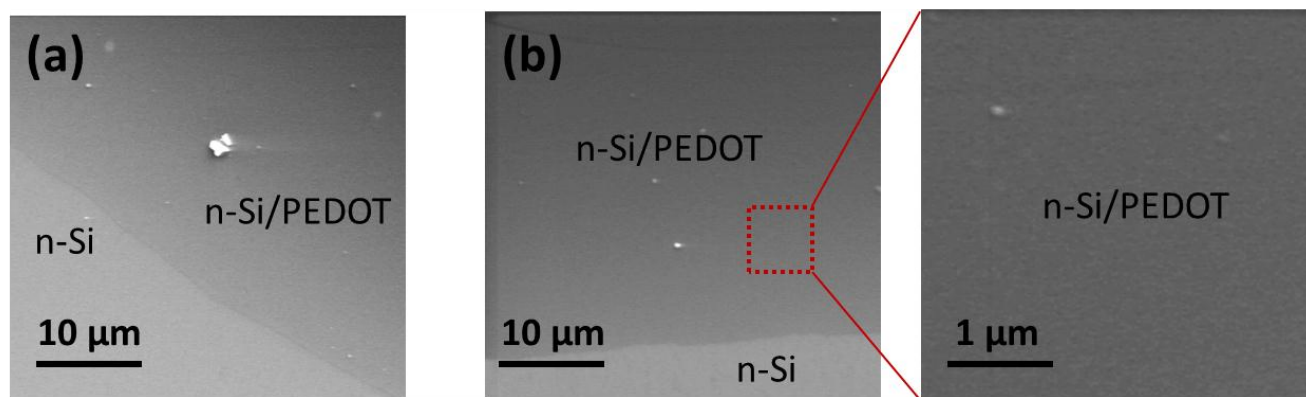

**Figure S2.** SEM image of EG-PEDOT: PSS coated n-Si anode before (a) and after HBr photolysis (b). Inset in (b) shows high magnification SEM image of EG-PEDOT: PSS coated n-Si anode.

5

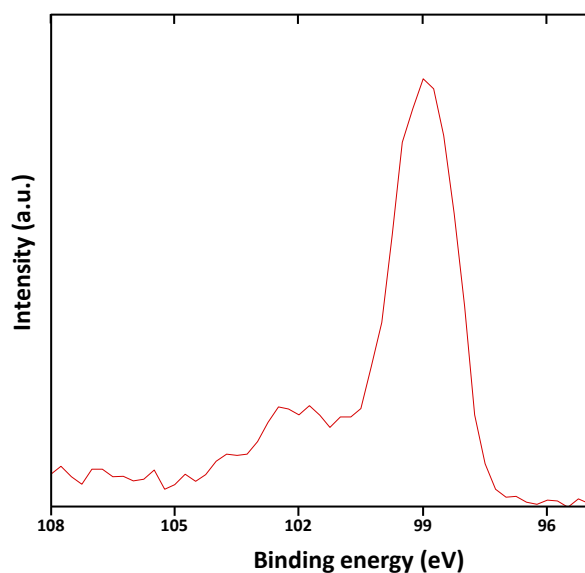

**Figure S3.** X-ray photoelectron spectrum of underlying silicon substrate after EG-PEDOT: PSS delamination. Prior to delamination and XPS measurements, photoelectrochemical measurements in HBr were performed at a bias of 0.6 V with respect to platinum electrode for 6 hours.

10

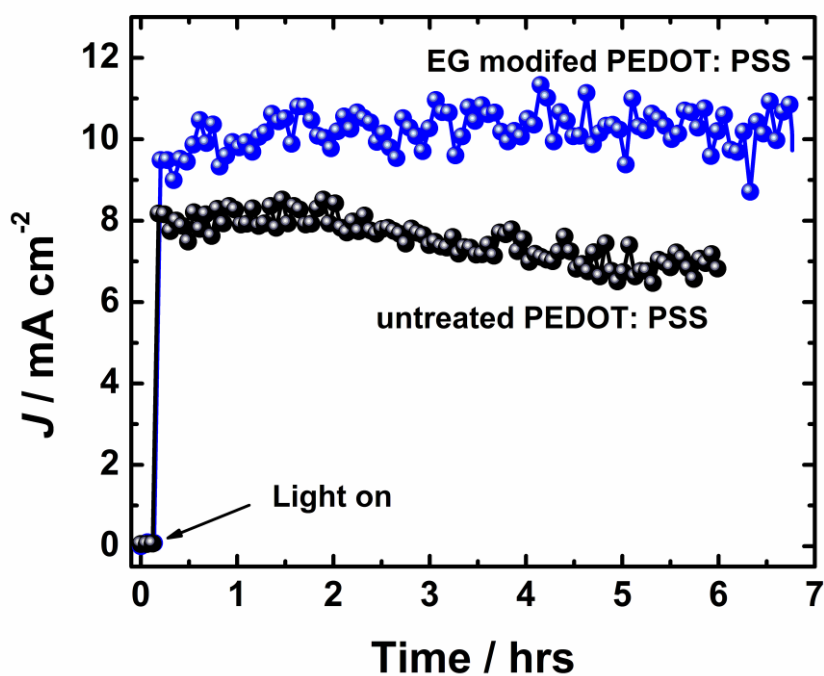

**Figure S4.** Photocurrent performance of PEDOT: PSS coated n-Si anode illuminated at 35 mW cm<sup>-2</sup> in HBr. Ethylene glycol treated PEDOT: PSS (blue trace) showed higher photocurrents with superior stability compared to untreated PEDOT: PSS (black trace). HBr electrolysis was performed at a bias of 0.6 V with respect to platinum electrode.
